# Supplementary figures and images for: Label‐free characterization of an extracellular vesicle‐based therapeutic
Source: PubMed Central journal article supplement — J Extracell Vesicles. 2021 Oct 20;10(12):e12156. doi: 10.1002/jev2.12156 (PMC8528092; doi:10.1002/jev2.12156), 2021-10-20

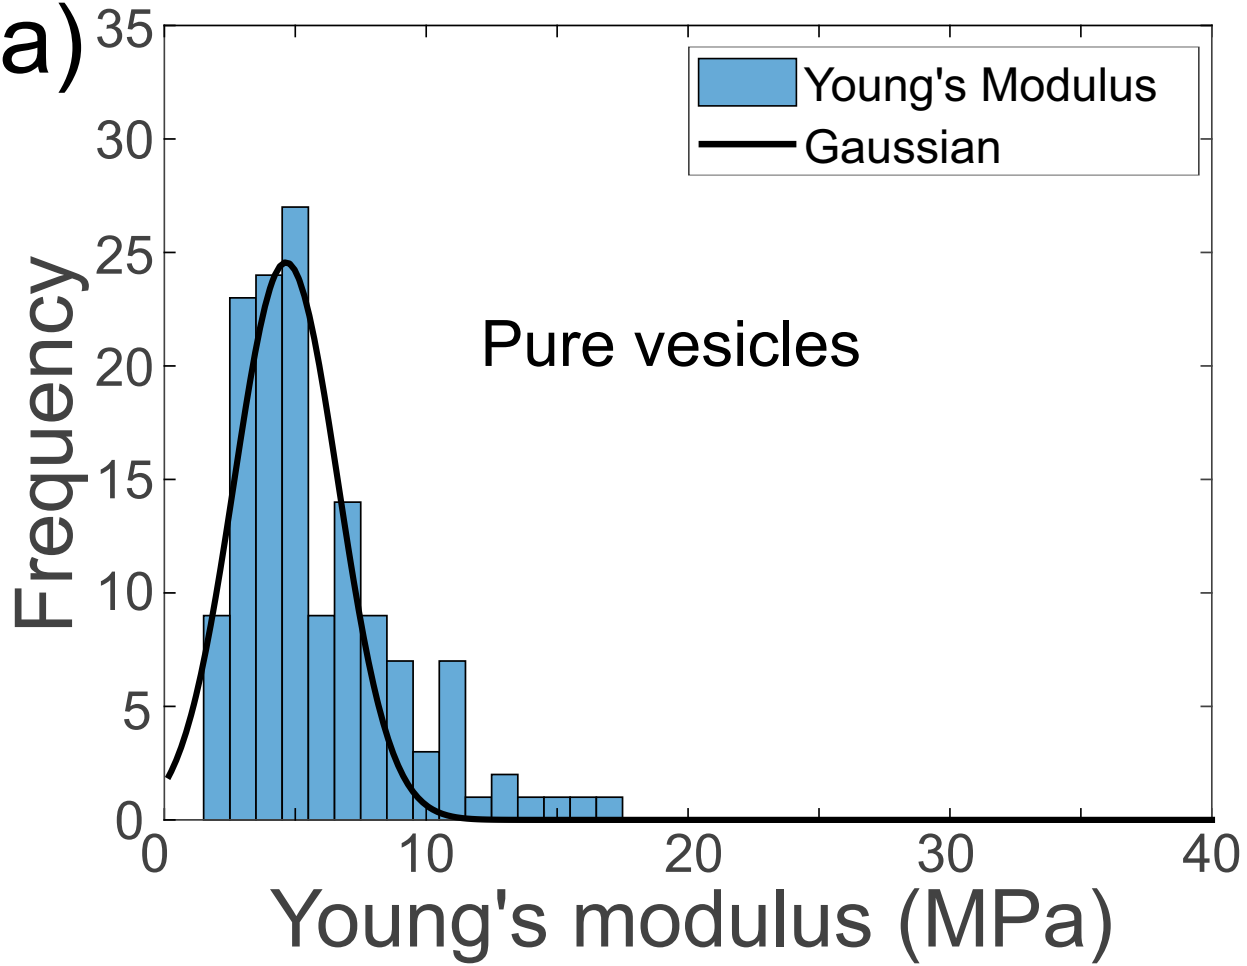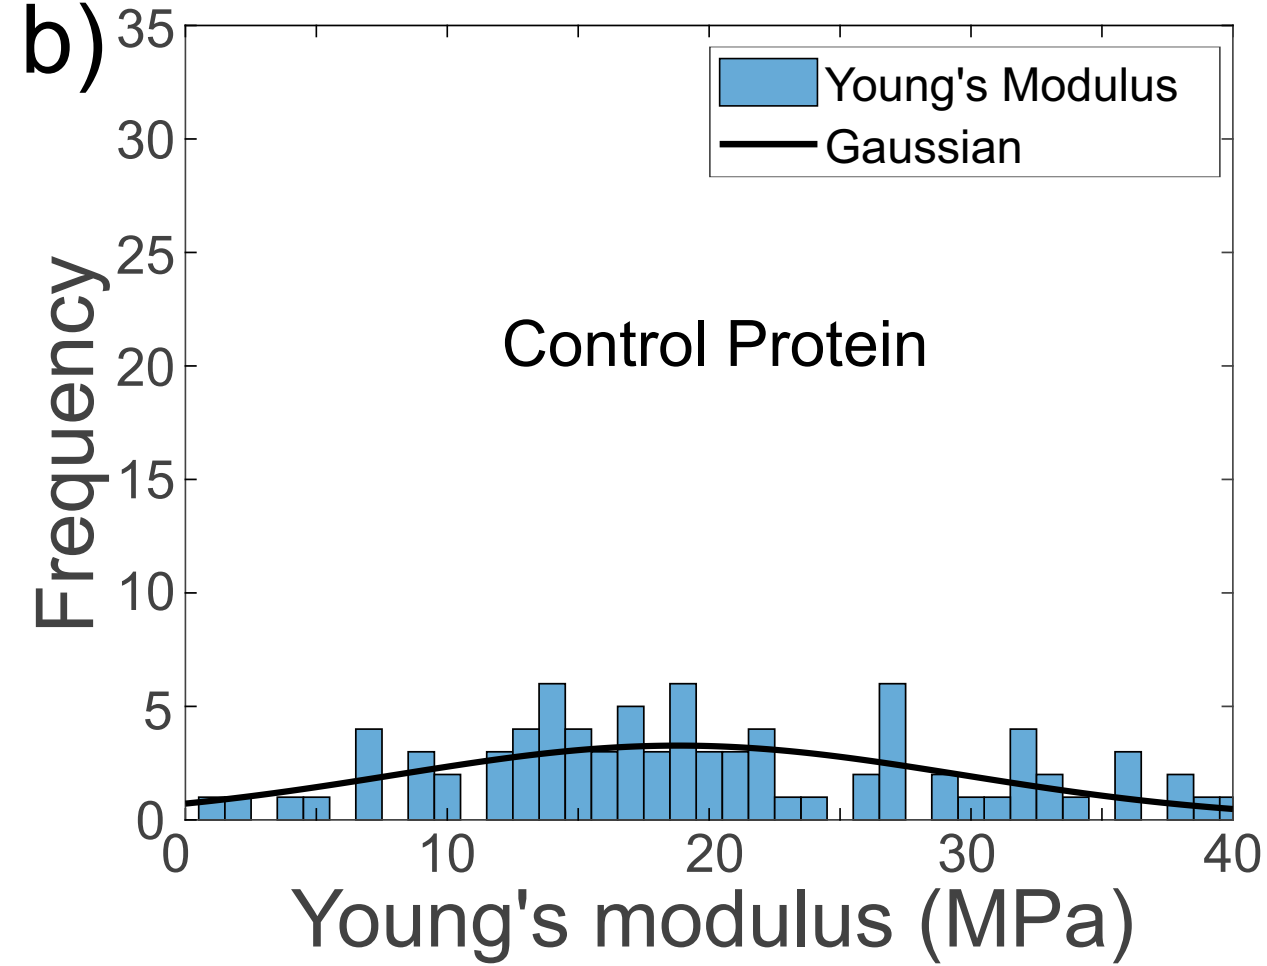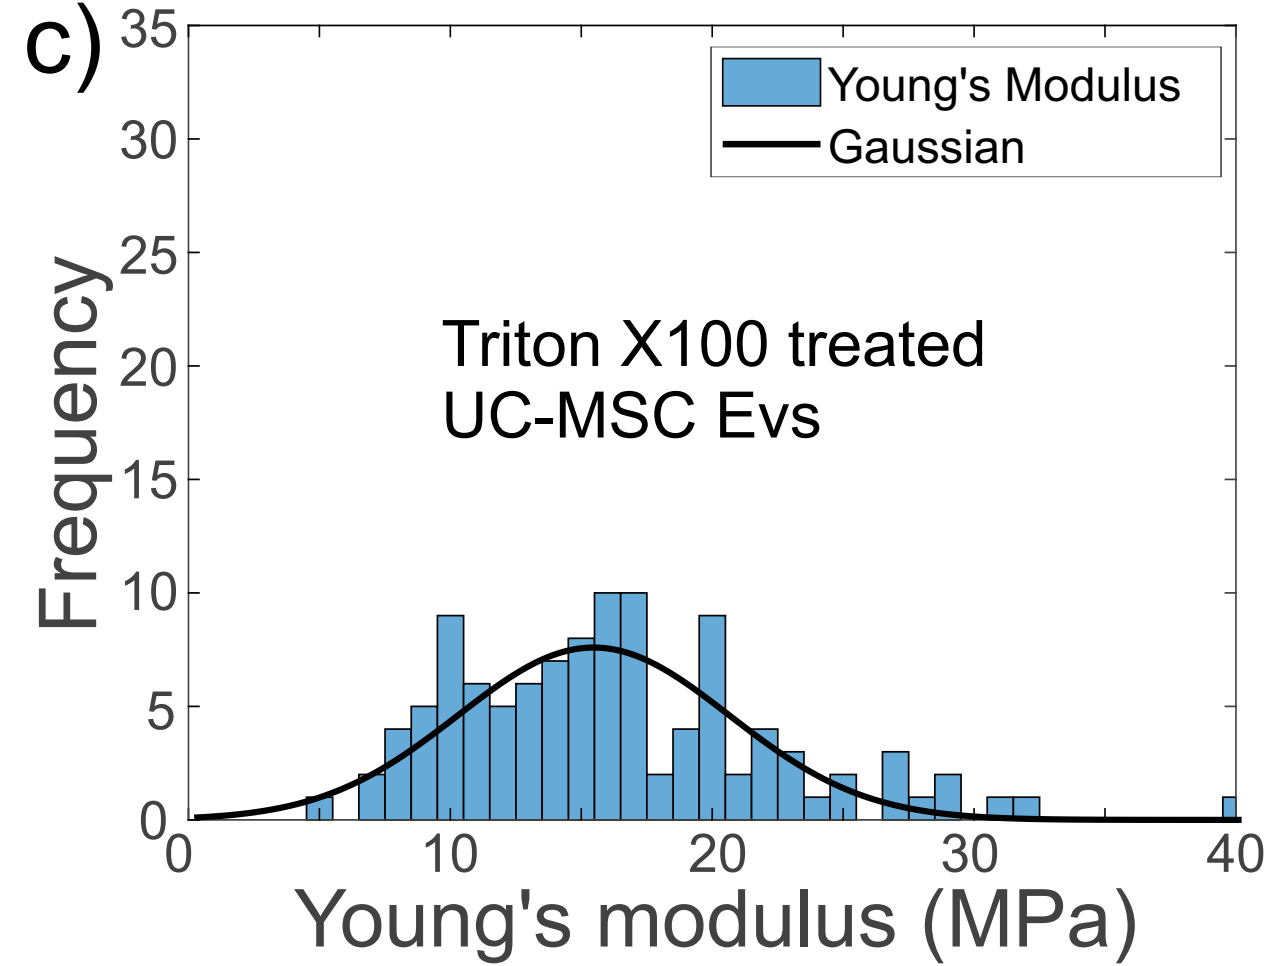

Supplement: JEV2-10-e12156-s001.pdf [file JEV2-10-e12156-s001.pdf]

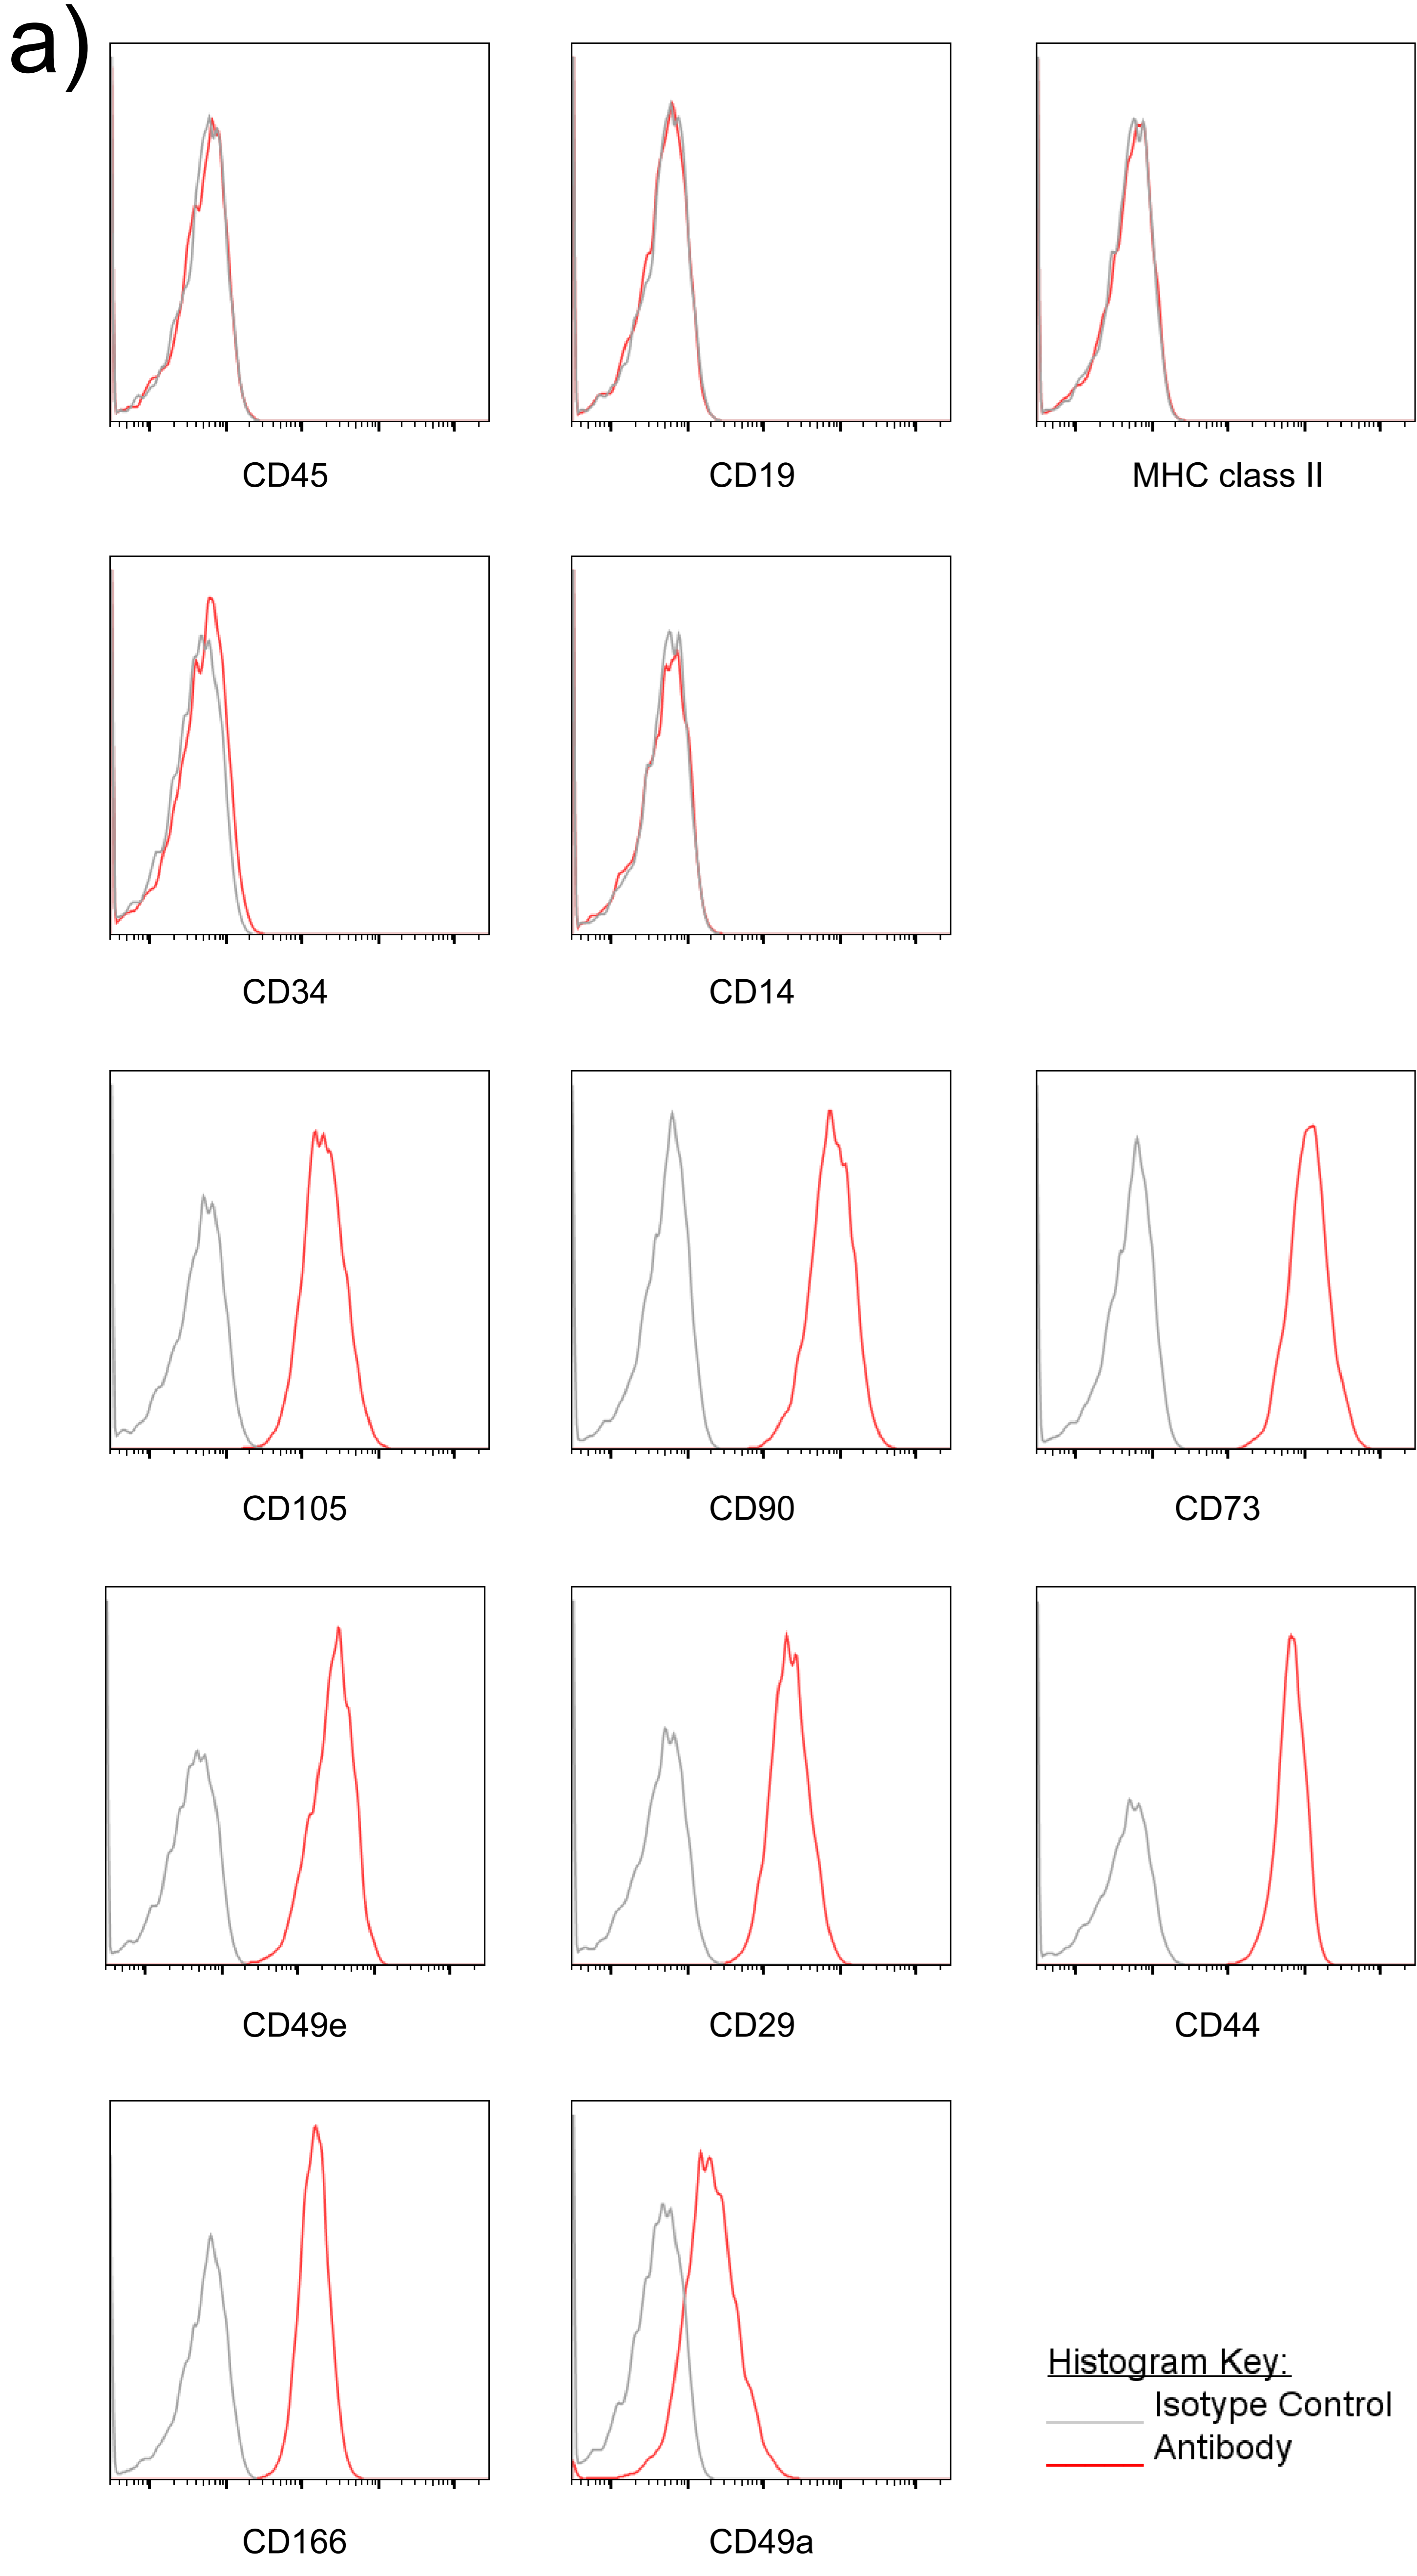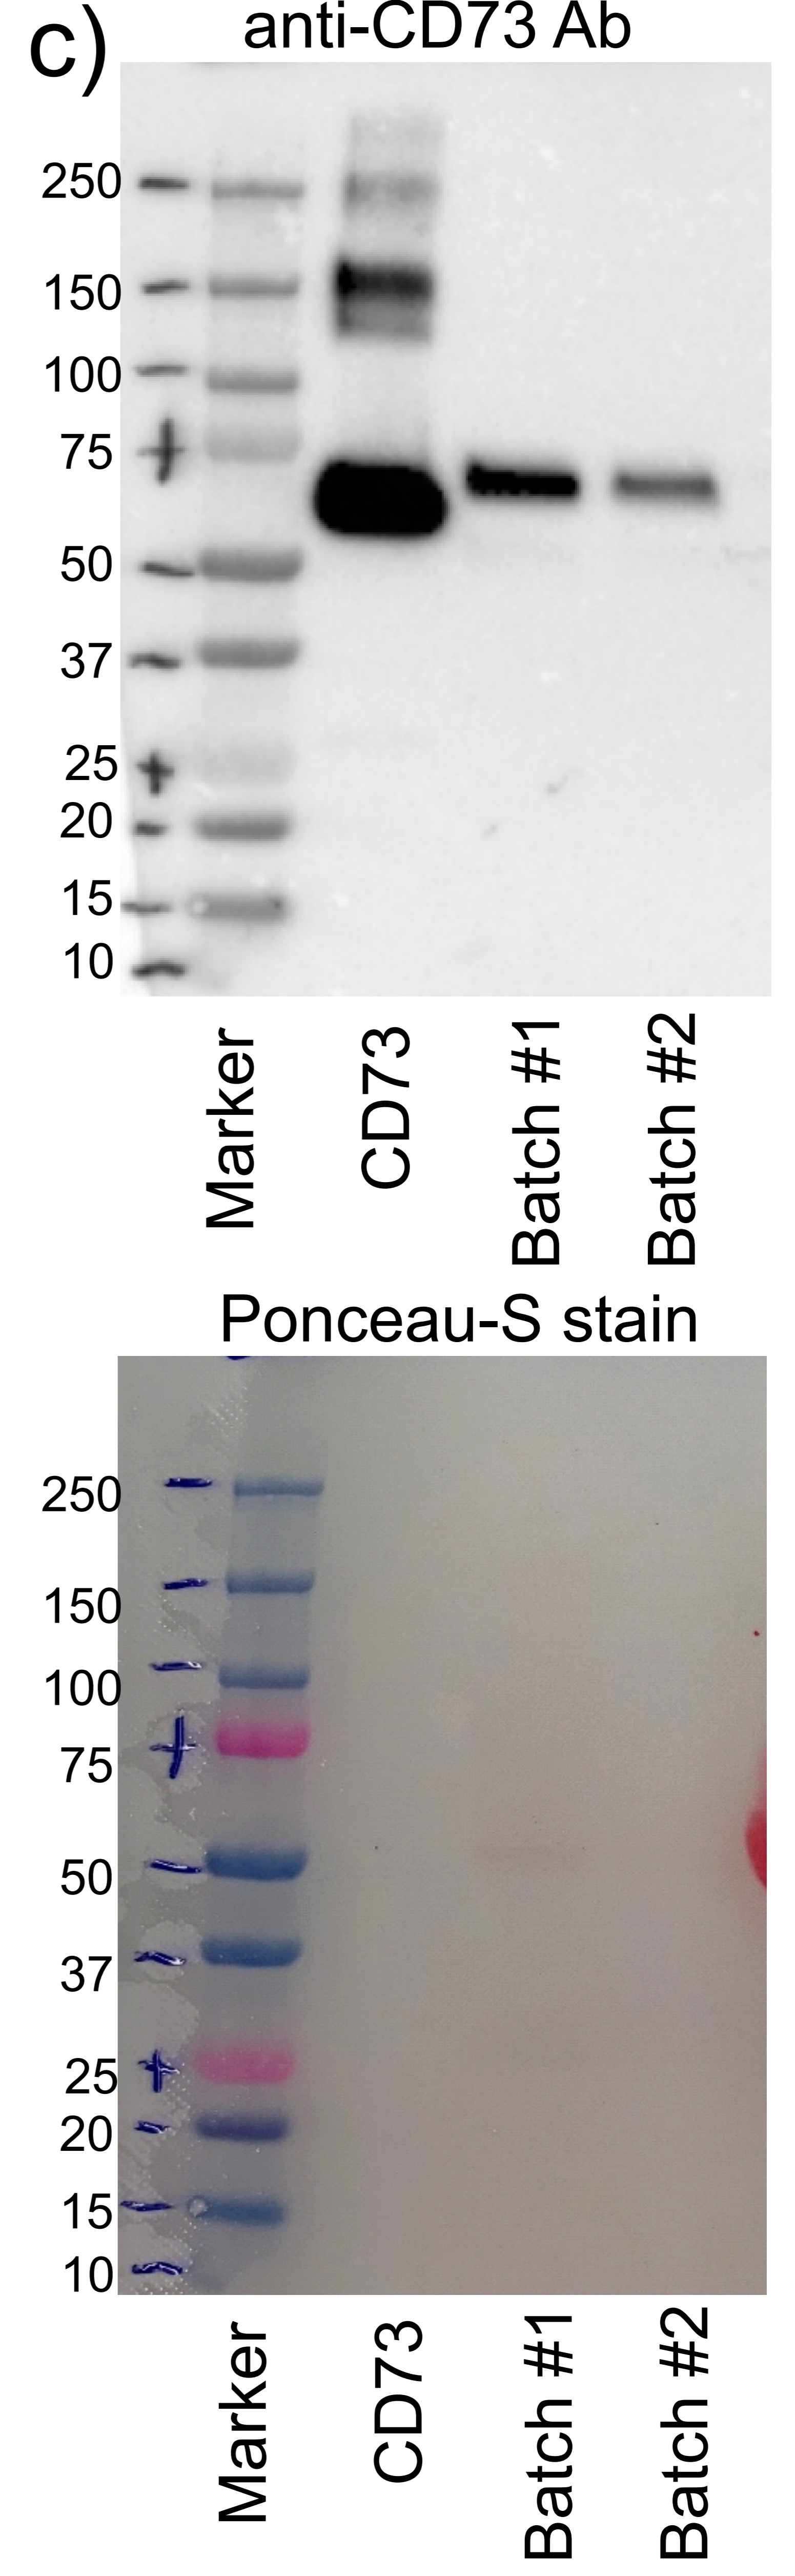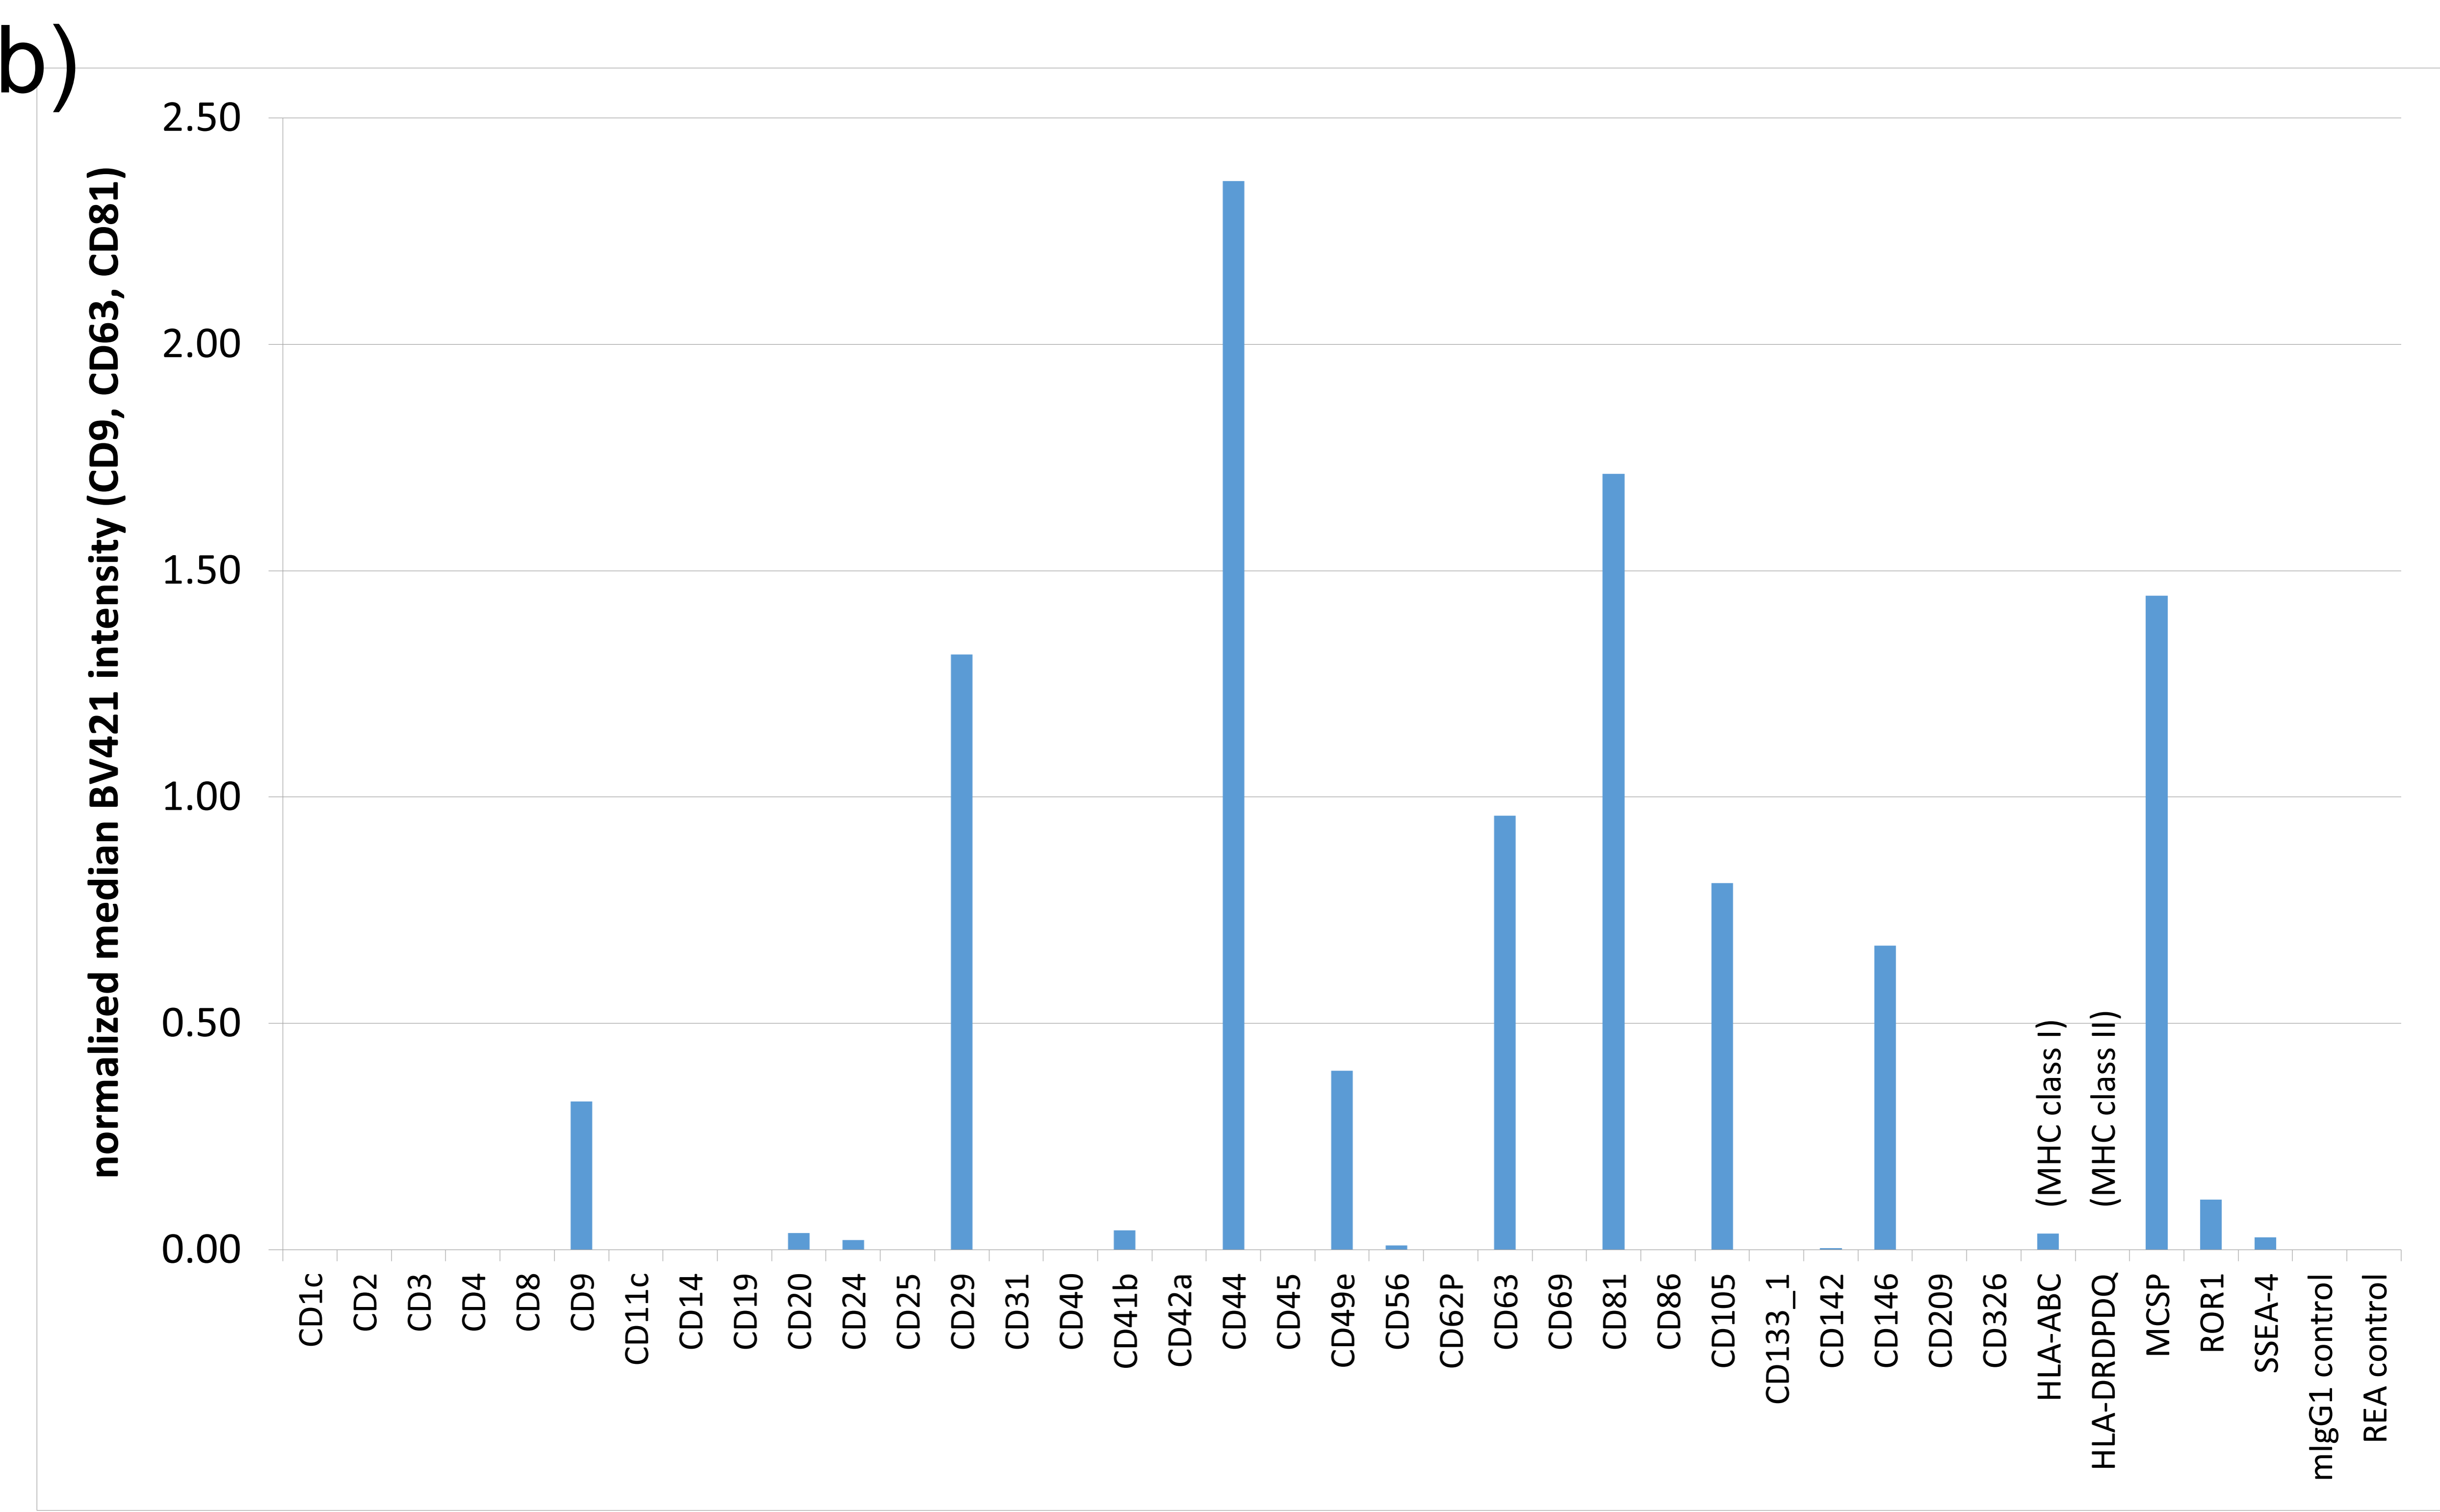

Supplement: JEV2-10-e12156-s002.pdf [file JEV2-10-e12156-s002.pdf]

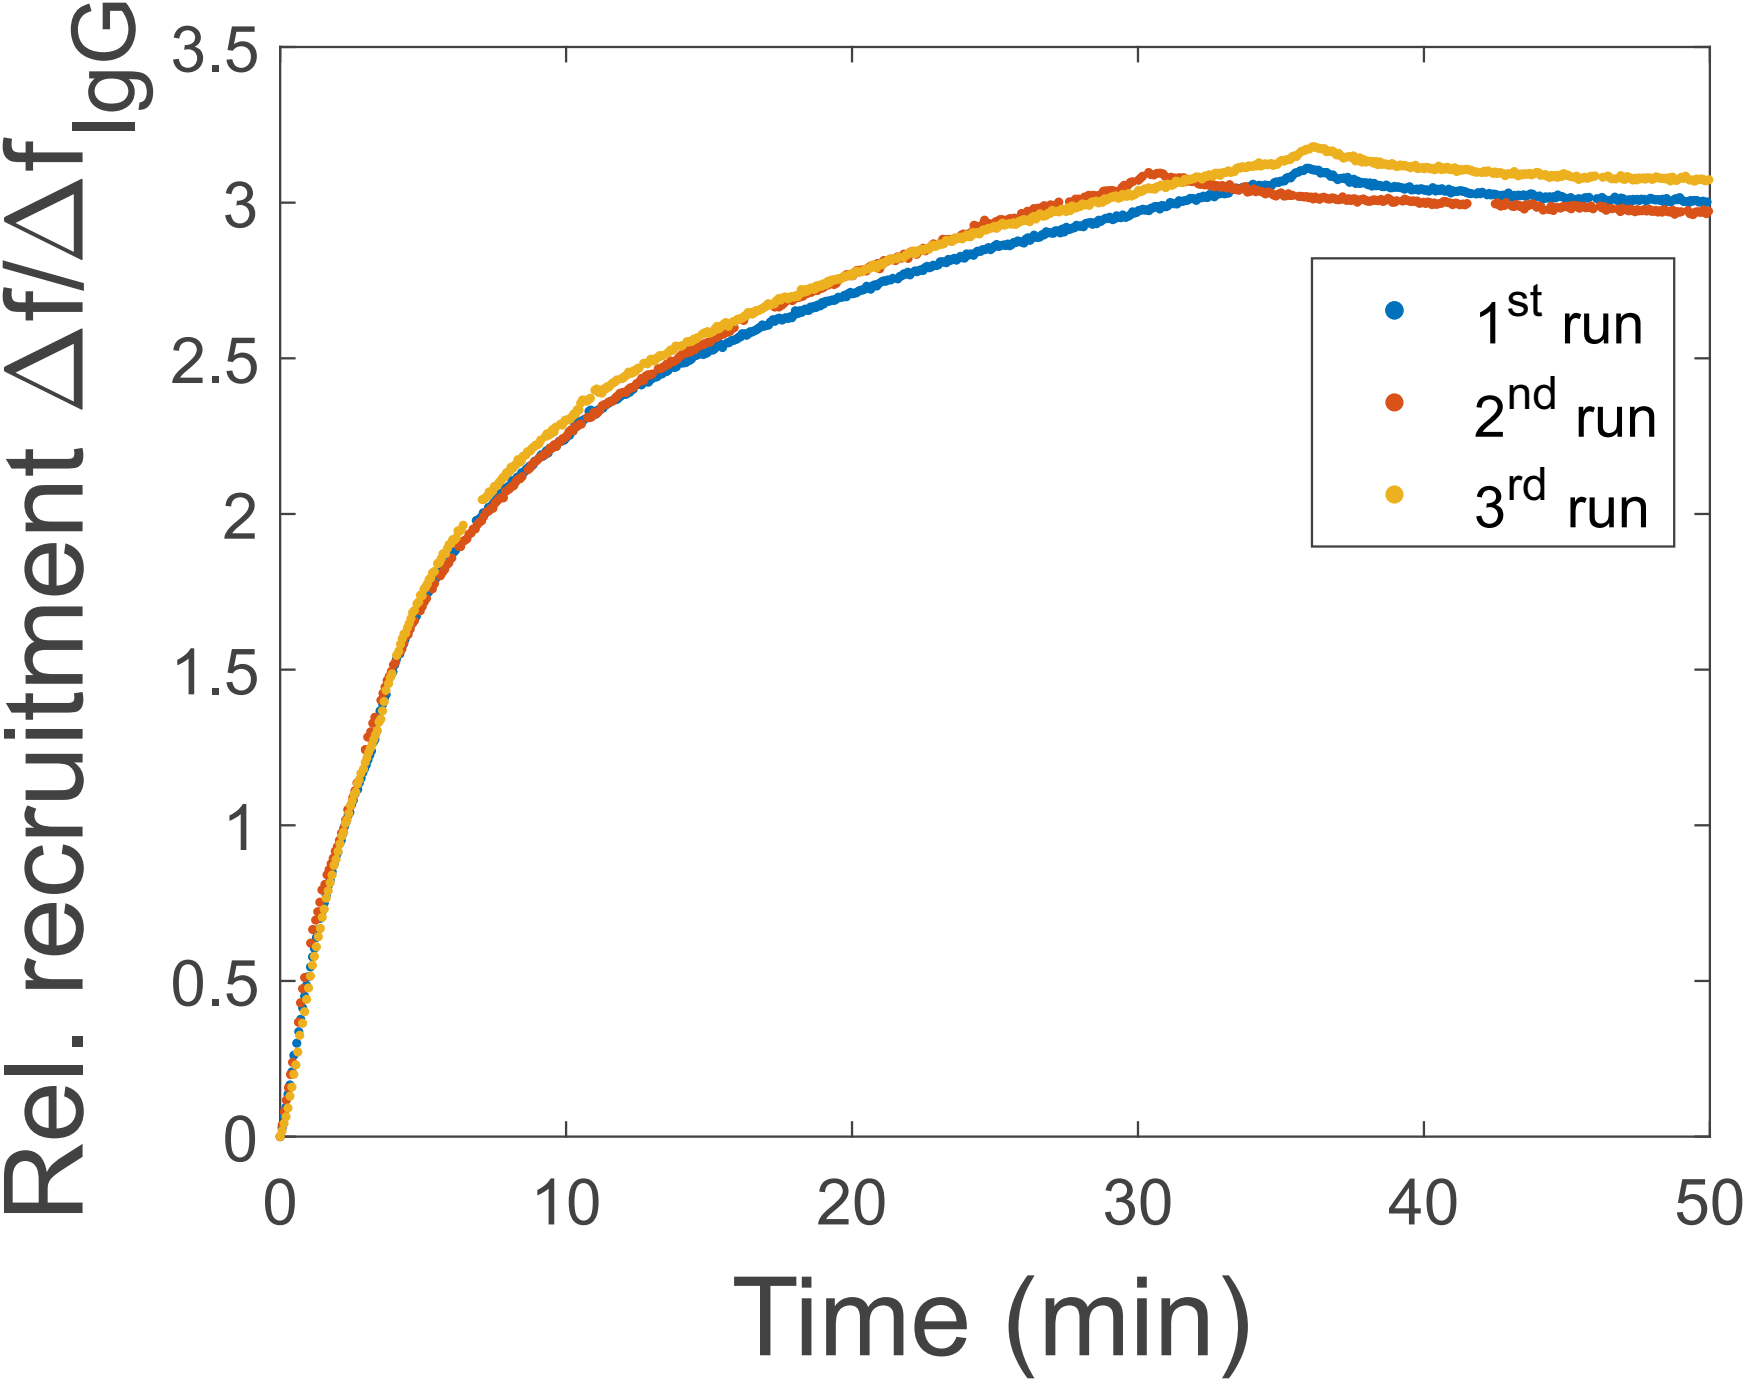

Supplement: JEV2-10-e12156-s004.pdf [file JEV2-10-e12156-s004.pdf]

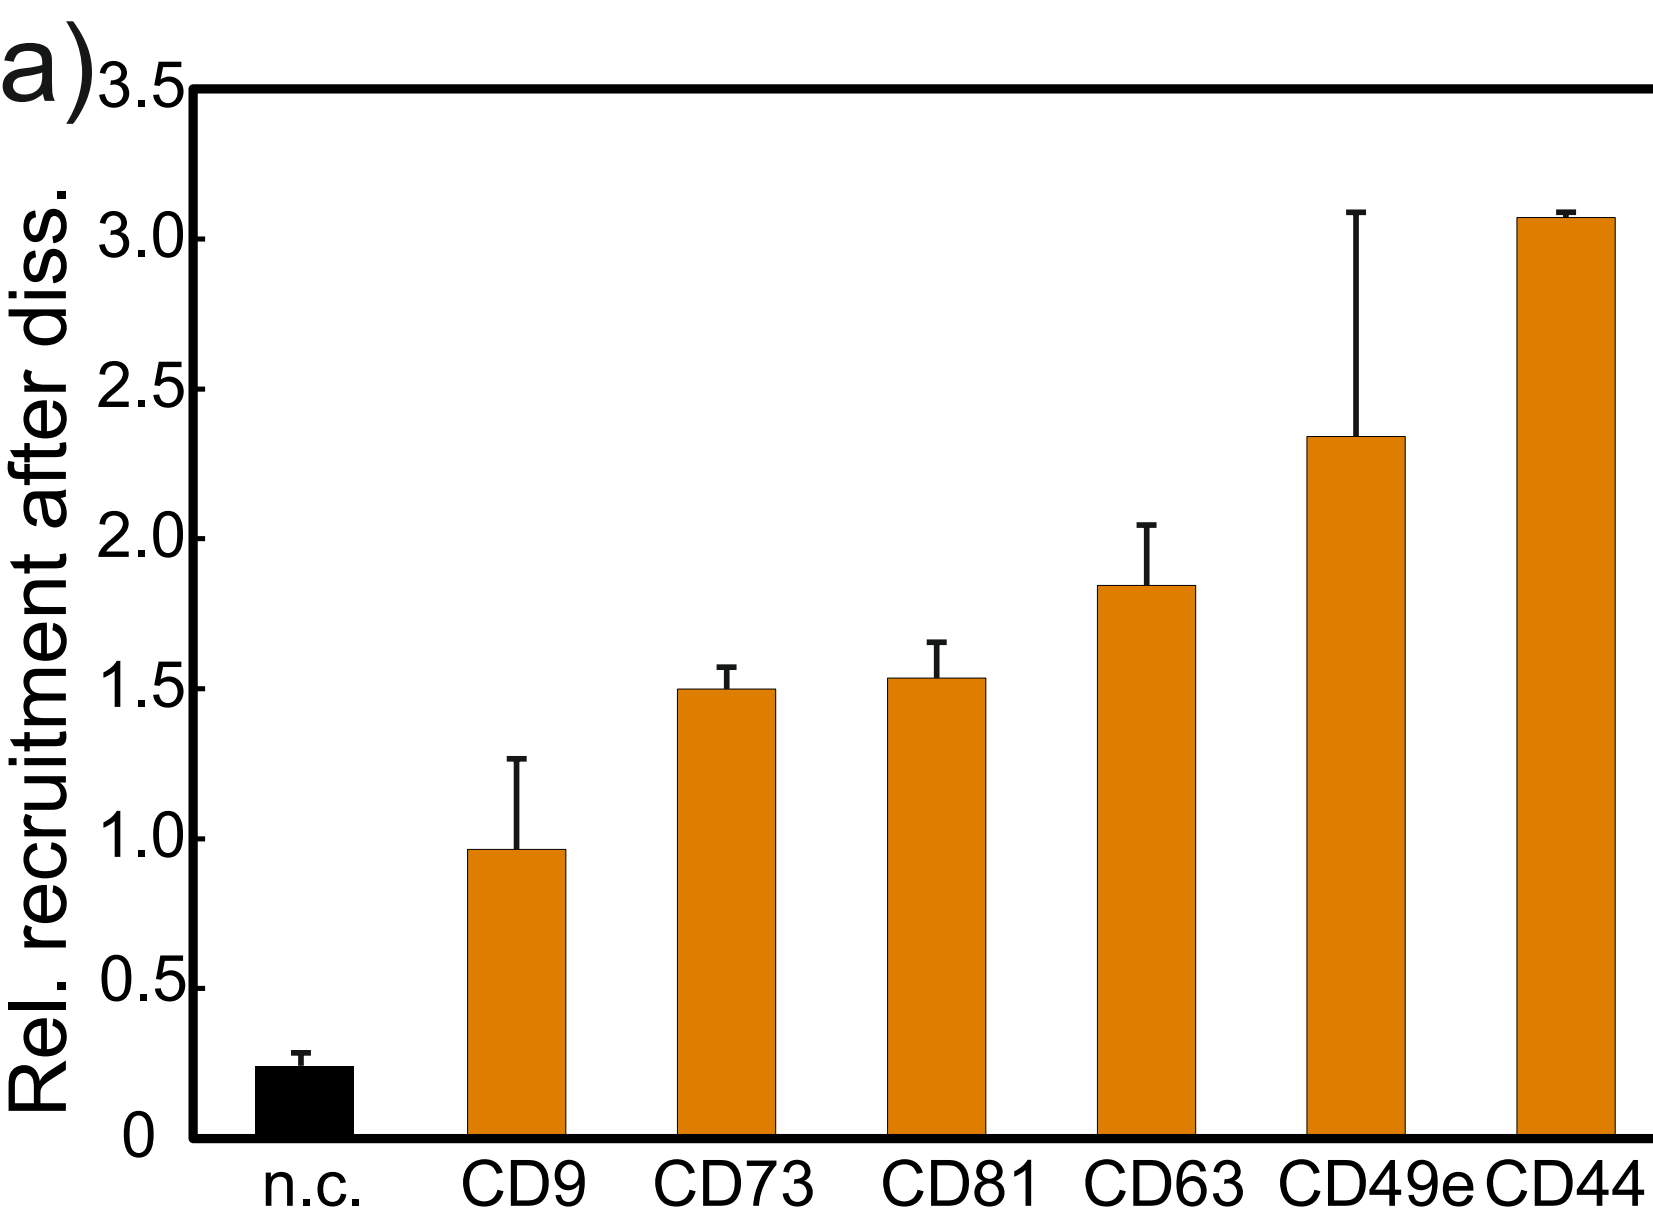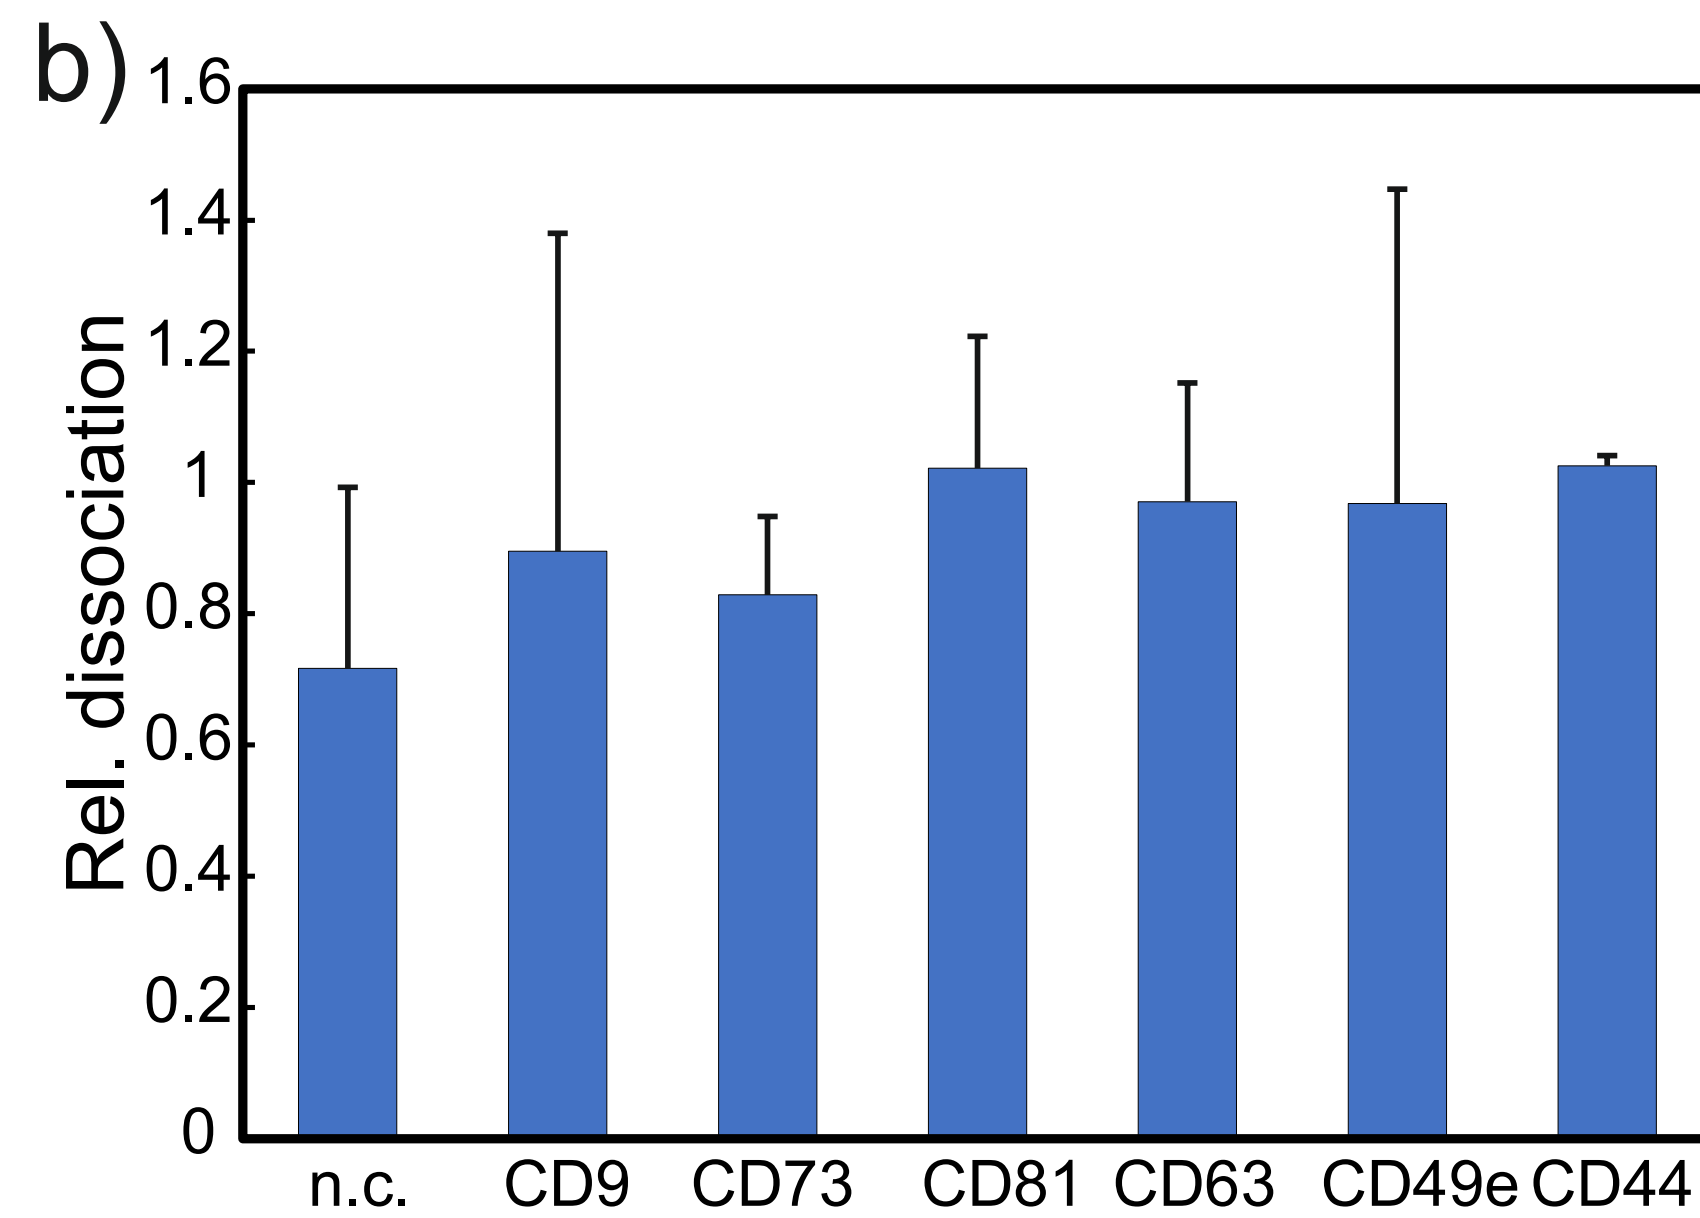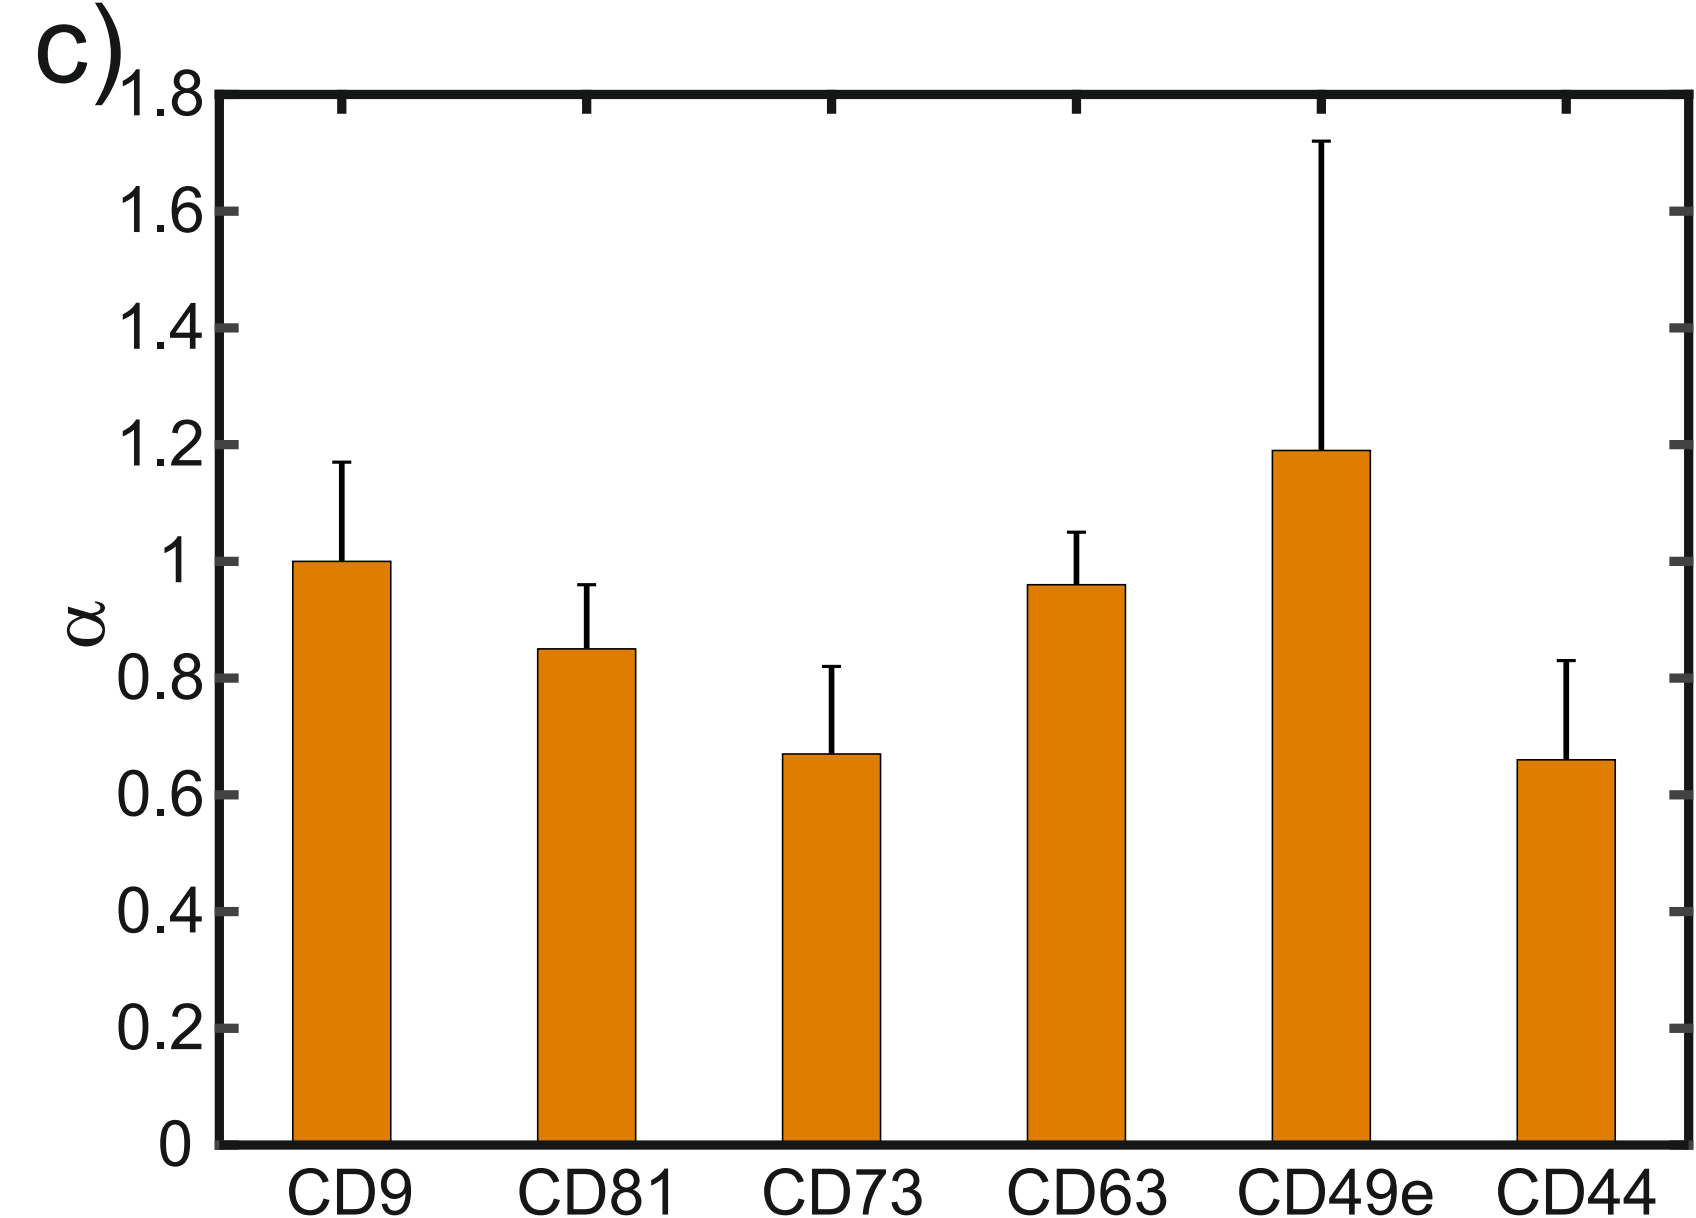

Supplement: JEV2-10-e12156-s005.pdf [file JEV2-10-e12156-s005.pdf]
